# Supplementary material for: Phospholipase Lpl1 links lipid droplet function with quality control protein degradation
Source: PubMed Central journal article supplement — Mol Biol Cell. 2017 Mar 15;28(6):716–25. doi: 10.1091/mbc.E16-10-0717 (PMC5349779; doi:10.1091/mbc.e16-10-0717), 2017-03-15
Supplement: supp_E16-10-0717v1_CombinedSupMats.pdf [file supp_E16-10-0717v1_CombinedSupMats.pdf]

# Supplemental Materials

*Molecular Biology of the Cell*

Weisshaar et al.

## Supplementary Information

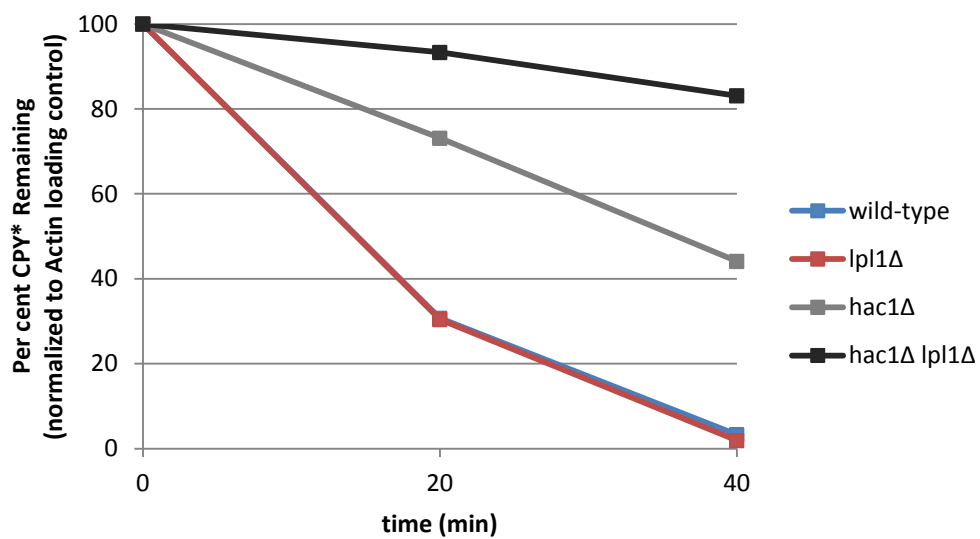

**Supplementary Figure 1.** Quantitation of the results of Figure 3B, as determined by NIH Image J. The time zero points were each set to 100%, and the results were normalized to the Actin loading control.
